# Supplementary material for: Comparative evaluation of enzyme-free nanoclay-ionic liquid based electrodes for detection of bioanalytes
Source: Royal Society of Chemistry journal article supplement (doi:10.1039/c6ra11514d), 2016-01-01
Supplement: c6ra11514d1.pdf [file c6ra11514d1.pdf]

### Electronic Supplementary Information

#### **Comparative Evaluation of Enzyme-Free Nanoclay-Ionic liquid based Electrodes for detection of bioanalytes**

Nidhi Joshi<sup>1</sup>, Abhimanyu Sharma<sup>2,3</sup>, Kamla Rawat<sup>2,3\*</sup>, K. Ashokan<sup>3</sup>, P. R. Solanki<sup>2</sup>, G.B.S. Lakshmi<sup>3</sup>, D. Kanjilal<sup>3</sup>, and H. B. Bohidar<sup>1,2\*</sup>

<sup>1</sup>Polymer and Biophysics Laboratory, School of Physical Sciences,  
Jawaharlal Nehru University, New Delhi 110067, India

<sup>2</sup>Special Center for Nanosciences,  
Jawaharlal Nehru University, New Delhi 110067, India

<sup>3</sup>Inter University Accelerator Centre, New Delhi 110067, India

\*Corresponding authors email: [bohi0700@mail.jnu.ac.in](mailto:bohi0700@mail.jnu.ac.in), [kamla.jnu@gmail.com](mailto:kamla.jnu@gmail.com)

Tel: +91 11 2670 4699, Fax: +91 11 2674 1837

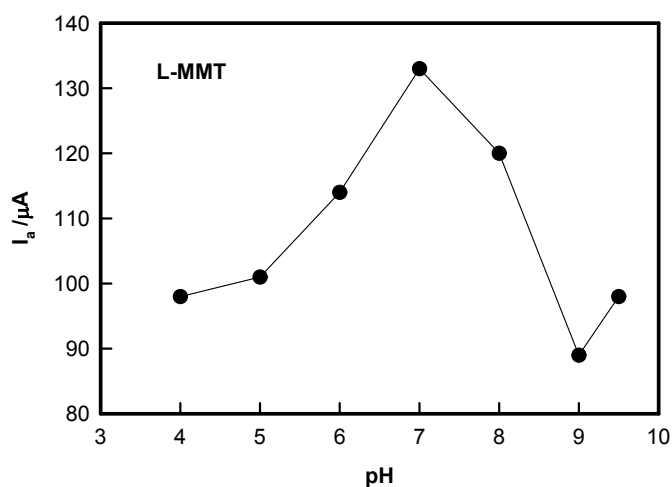

**Fig. S1** Cathodic current as a function of pH where we get the maximum current for pH = 7 thus fixed the pH.

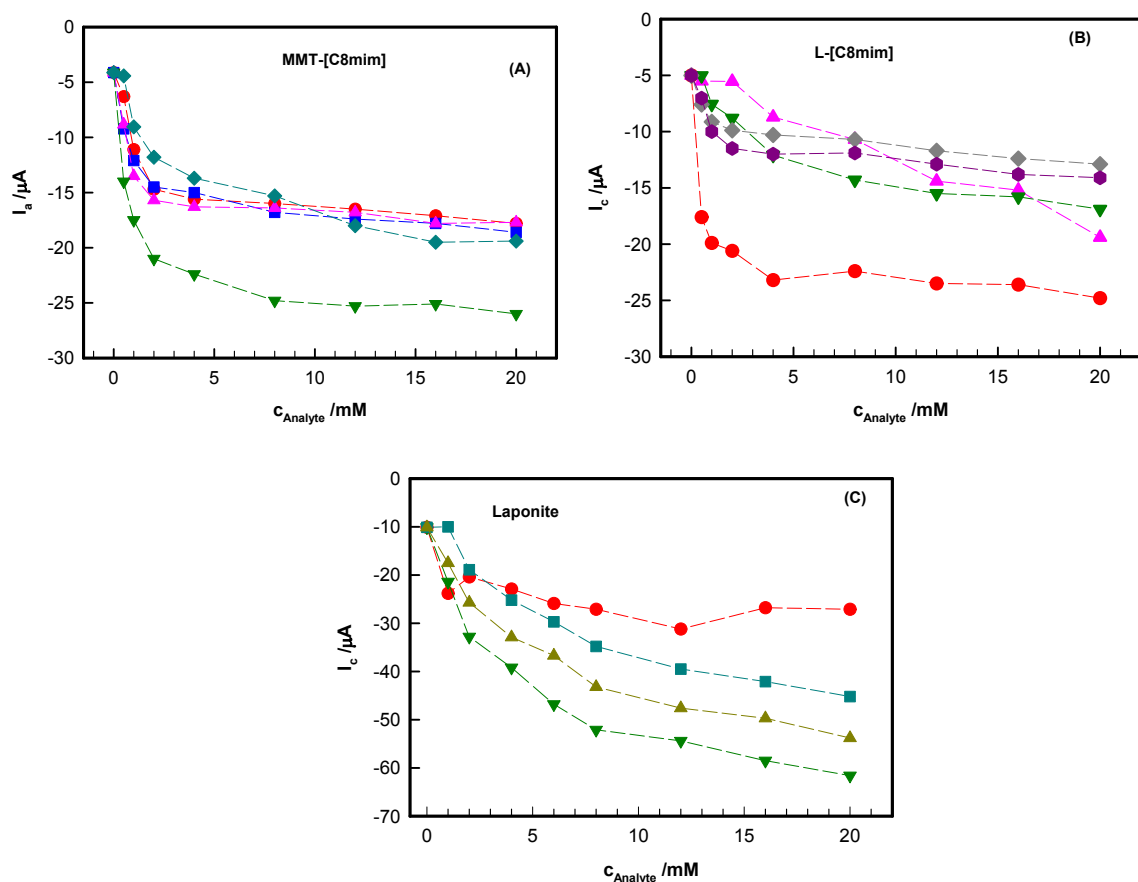

**Fig. S2** Calibration plot for Cathodic current versus analyte concentration for (A) MMT-[C8mim], (B) L-[C8mim] and (C) Laponite.

**Table ST1:** Comparative response of Laponite based matrices. Maximum error in the reported values does not exceed  $\pm 10\%$ .

| S. No | Fluence ions/cm <sup>2</sup> | Charge transfer constant ( $K_s$ )s <sup>-1</sup> | Average surface concentration ( $I^*$ ) x10 <sup>-8</sup> mol/cm <sup>2</sup> | Diffusion coefficient (D) x10 <sup>-12</sup> cm <sup>2</sup> /s | Sensitivity ( $\mu$ A/mMcm <sup>2</sup> ) |
|-------|------------------------------|---------------------------------------------------|-------------------------------------------------------------------------------|-----------------------------------------------------------------|-------------------------------------------|
| 1     | 10 <sup>13</sup>             | 0.016                                             | 0.022                                                                         | 0.0021                                                          | 3.7960                                    |
| 2     | 5x10 <sup>13</sup>           | 0.014                                             | 0.022                                                                         | 0.0020                                                          | 3.6572                                    |
| 3     | 10 <sup>14</sup>             | 0.013                                             | 0.020                                                                         | 0.0014                                                          | 2.8636                                    |
| 4     | 5x10 <sup>14</sup>           | 0.01                                              | 0.019                                                                         | 0.0012                                                          | 2.7400                                    |
| 5     | 10 <sup>15</sup>             | 0.0081                                            | 0.016                                                                         | 0.0010                                                          | 2.2136                                    |
| 6     | 5x10 <sup>15</sup>           | 0.0080                                            | 0.008                                                                         | 0.0009                                                          | 1.2700                                    |

**Table ST2:** Comparative response of MMT based matrices. Maximum error in the reported values does not exceed  $\pm 10\%$ .

| S. No | Fluence ions/cm <sup>2</sup> | Charge transfer constant (K <sub>s</sub> )s <sup>-1</sup> | Average surface concentration (I*) x10 <sup>-8</sup> mol/cm <sup>2</sup> | Diffusion coefficient (D) x10 <sup>-12</sup> cm <sup>2</sup> /s | Sensitivity (μA/mMcm <sup>2</sup> ) |
|-------|------------------------------|-----------------------------------------------------------|--------------------------------------------------------------------------|-----------------------------------------------------------------|-------------------------------------|
| 1     | 10 <sup>13</sup>             | 0.0049                                                    | 0.0097                                                                   | 0.0005                                                          | 0.8224                              |
| 2     | 10 <sup>14</sup>             | 0.0033                                                    | 0.0091                                                                   | 0.0005                                                          | 0.8036                              |
| 3     | 5x10 <sup>14</sup>           | 0.0001                                                    | 0.0006                                                                   | 0.00003                                                         | 0.0779                              |
| 4     | 10 <sup>15</sup>             | 0.0038                                                    | 0.0098                                                                   | 0.0006                                                          | 0.9724                              |
| 5     | 5x10 <sup>15</sup>           | 0.0021                                                    | 0.0040                                                                   | 0.0002                                                          | 0.3138                              |

**Table ST3:** Comparative response of L-[C2mim] based matrices. Maximum error in the reported values does not exceed  $\pm 10\%$ .

| S. No | Fluence ions/cm <sup>2</sup> | Charge transfer constant (K <sub>s</sub> )s <sup>-1</sup> | Average surface concentration (I*) x10 <sup>-8</sup> mol/cm <sup>2</sup> | Diffusion coefficient (D) x10 <sup>-12</sup> cm <sup>2</sup> /s | Sensitivity (μA/mMcm <sup>2</sup> ) |
|-------|------------------------------|-----------------------------------------------------------|--------------------------------------------------------------------------|-----------------------------------------------------------------|-------------------------------------|
| 1     | 10 <sup>13</sup>             | 0.030                                                     | 0.0073                                                                   | 0.0003                                                          | 2.5020                              |
| 2     | 5x10 <sup>13</sup>           | 0.027                                                     | 0.0068                                                                   | 0.0001                                                          | 1.0572                              |
| 3     | 10 <sup>14</sup>             | 0.027                                                     | 0.0066                                                                   | 0.0001                                                          | 1.0100                              |
| 4     | 5x10 <sup>14</sup>           | 0.011                                                     | 0.0009                                                                   | 0.00008                                                         | 0.8024                              |
| 5     | 10 <sup>15</sup>             | 0.020                                                     | 0.0009                                                                   | 0.00008                                                         | 0.8268                              |
| 6     | 5x10 <sup>15</sup>           | 0.008                                                     | 0.0001                                                                   | 0.00002                                                         | 0.0304                              |

**Table ST4:** Comparative response of L-[C8mim] based matrices. Maximum error in the reported values does not exceed  $\pm 10\%$ .

| S. No | Fluence ions/cm <sup>2</sup> | Charge transfer constant (K <sub>s</sub> )s <sup>-1</sup> | Average surface concentration (I*) x10 <sup>-8</sup> mol/cm <sup>2</sup> | Diffusion coefficient (D) x10 <sup>-12</sup> cm <sup>2</sup> /s | Sensitivity (μA/mMcm <sup>2</sup> ) |
|-------|------------------------------|-----------------------------------------------------------|--------------------------------------------------------------------------|-----------------------------------------------------------------|-------------------------------------|
| 1     | 10 <sup>13</sup>             | 0.040                                                     | 0.0101                                                                   | 0.0015                                                          | 2.3740                              |
| 2     | 5x10 <sup>13</sup>           | 0.038                                                     | 0.0100                                                                   | 0.0012                                                          | 2.1404                              |
| 3     | 10 <sup>14</sup>             | 0.041                                                     | 0.0101                                                                   | 0.0015                                                          | 2.3216                              |
| 4     | 5x10 <sup>14</sup>           | 0.047                                                     | 0.0120                                                                   | 0.0017                                                          | 2.5556                              |
| 5     | 10 <sup>15</sup>             | 0.004                                                     | 0.0074                                                                   | 0.0002                                                          | 0.8244                              |
| 6     | 5x10 <sup>15</sup>           | 0.033                                                     | 0.0118                                                                   | 0.0015                                                          | 2.4152                              |

**Table ST5:** Comparative response of MMT-[C2mim] based matrices. Maximum error in the reported values does not exceed  $\pm 10\%$ .

| S. No | Fluence ions/cm <sup>2</sup> | Charge transfer constant (K <sub>s</sub> )s <sup>-1</sup> | Average surface concentration (I*) x10 <sup>-8</sup> mol/cm <sup>2</sup> | Diffusion coefficient (D) x10 <sup>-12</sup> cm <sup>2</sup> /s | Sensitivity (μA/mMcm <sup>2</sup> ) |
|-------|------------------------------|-----------------------------------------------------------|--------------------------------------------------------------------------|-----------------------------------------------------------------|-------------------------------------|
| 1     | 10 <sup>13</sup>             | 0.005                                                     | 0.013                                                                    | 0.001                                                           | 1.1540                              |
| 2     | 5x10 <sup>13</sup>           | 0.001                                                     | 0.010                                                                    | 0.0007                                                          | 0.9040                              |
| 3     | 10 <sup>14</sup>             | 0.003                                                     | 0.008                                                                    | 0.0006                                                          | 0.6876                              |
| 4     | 5x10 <sup>14</sup>           | 0.003                                                     | 0.009                                                                    | 0.0007                                                          | 0.7480                              |
| 5     | 10 <sup>15</sup>             | 0.0024                                                    | 0.008                                                                    | 0.0007                                                          | 0.8772                              |

**Table ST6:** Comparative response of MMT-[C8mim] based matrices. Maximum error in the reported values does not exceed  $\pm 10\%$ .

| S. No | Fluence ions/cm <sup>2</sup> | Charge transfer constant (K <sub>s</sub> )s <sup>-1</sup> | Average surface concentration (I*) x10 <sup>-8</sup> mol/cm <sup>2</sup> | Diffusion coefficient (D) x10 <sup>-12</sup> cm <sup>2</sup> /s | Sensitivity (μA/mMcm <sup>2</sup> ) |
|-------|------------------------------|-----------------------------------------------------------|--------------------------------------------------------------------------|-----------------------------------------------------------------|-------------------------------------|
| 1     | 10 <sup>13</sup>             | 0.0015                                                    | 0.0036                                                                   | 0.00007                                                         | 1.7124                              |
| 2     | 5x10 <sup>13</sup>           | 0.007                                                     | 0.0041                                                                   | 0.0001                                                          | 2.0320                              |
| 3     | 10 <sup>14</sup>             | 0.0011                                                    | 0.0007                                                                   | 0.00002                                                         | 0.5288                              |
| 4     | 10 <sup>15</sup>             | 0.0014                                                    | 0.0003                                                                   | 0.00003                                                         | 0.4404                              |
| 5     | 5x10 <sup>15</sup>           | 0.0014                                                    | 0.0003                                                                   | 0.00002                                                         | 0.4472                              |

**Table ST7:** Comparative response of L-MMT based matrices. Maximum error in the reported values does not exceed  $\pm 10\%$ .

| S. No | Fluence ions/cm <sup>2</sup> | Charge transfer constant (K <sub>s</sub> )s <sup>-1</sup> | Average surface concentration (I*) x10 <sup>-8</sup> mol/cm <sup>2</sup> | Diffusion coefficient (D) x10 <sup>-12</sup> cm <sup>2</sup> /s | Sensitivity (μA/mMcm <sup>2</sup> ) |
|-------|------------------------------|-----------------------------------------------------------|--------------------------------------------------------------------------|-----------------------------------------------------------------|-------------------------------------|
| 1     | 10 <sup>13</sup>             | 0.0018                                                    | 0.0056                                                                   | 0.00018                                                         | 2.5280                              |
| 2     | 5x10 <sup>13</sup>           | 0.0015                                                    | 0.0048                                                                   | 0.00015                                                         | 1.7076                              |
| 3     | 10 <sup>14</sup>             | 0.0017                                                    | 0.0052                                                                   | 0.00018                                                         | 2.0528                              |
| 4     | 5x10 <sup>14</sup>           | 0.0009                                                    | 0.0008                                                                   | 0.00002                                                         | 0.6788                              |
| 5     | 10 <sup>15</sup>             | 0.0011                                                    | 0.0010                                                                   | 0.00005                                                         | 0.9056                              |
| 6     | 5x10 <sup>15</sup>           | 0.0010                                                    | 0.0010                                                                   | 0.00005                                                         | 0.8440                              |
